# Supplementary material for: Temporal Changes in Mindfulness Skills and Positive and Negative Affect and Their Interrelationships During Mindfulness-Based Cognitive Therapy for Cancer Patients
Source: Springer Nature journal article supplement (doi:10.1007/s12671-022-01912-9), 2022-06-20
Supplement: MOESM1 [file 23185758]

**Supplementary materials**

Table S1.

Results from the fitted Multivariate Latent Curve Models (LCM), Autoregressive Models, and Autoregressive Latent Trajectory (ALT) Models for mindfulness (MAAS) and positive affect (PA).

| Models | *χ2* (df) | CM | Δ *χ2* (df), *p* | CFI | TLI | RMSEA | SRMR |
| --- | --- | --- | --- | --- | --- | --- | --- |
| 1. LCM, full model | 338.60 (157) | - | - | 0.916 | 0.918 | 0.085 | 0.097 |
| 2. Autoregressive, full model | 343.35 (112) | - | - | 0.892 | 0.854 | 0.114 | 0.134 |
| 3. ALT, full model | 166.34 (106) | - | - | 0.972 | 0.960 | 0.060 | 0.074 |
| 4. ALT, nested LCM model | 247.79 (138) | 3 | 108.46 (32), <.01 | 0.949 | 0.944 | 0.071 | 0.090 |
| 5. ALT, no slope variance on MAAS | 218.92 (112) | 3 | 52.59 (6), <.01 | 0.950 | 0.933 | 0.077 | 0.068 |
| 6. ALT, no slope on MAAS | 219.00 (113) | 3 | 52.67 (7), <.01 | 0.951 | 0.934 | 0.077 | 0.067 |
| 7. ALT 3 + no slope variance on PA | 182.25 (112) | 3 | 15.92 (6), <.05 | 0.967 | 0.956 | 0.063 | 0.076 |
| 8. ALT 3 + no slope on PA | 183.37 (113) | 3 | 17.04 (7), <.05 | 0.967 | 0.956 | 0.063 | 0.077 |
| 9. ALT 3 + no time-specific uniqueness correlations | EP |  |  |  |  |  |  |
| 10. ALT 3 + fixed time-specific uniqueness correlations | 174.77 (113) | 3 | 8.43 (7*), ns* | 0.971 | 0.961 | 0.059 | 0.070 |
| 11. ALT 10 + fixed autoregressions for MAAS | 189.87 (120) | 10 | 15.11 (7), <.04 | 0.968 | 0.959 | 0.061 | 0.073 |
| 12. ALT 10 + fixed autoregressions for PA | 178.00 (120) | 10 | 3.24 (7), ns | 0.973 | 0.966 | 0.055 | 0.074 |
| 13. ALT 12 + fixed MAAS > PA regressions | 195.67 (127) | 12 | 17.67 (7), <.01 | 0.968 | 0.962 | 0.058 | 0.077 |
| **14. ALT 12 + fixed PA > MAAS regressions** | **184.66 (127)** | **12** | **6.66 (7), ns** | **0.973** | **0.968** | **0.053** | **0.074** |
| Final conditional multivariate ALT (ALT 14 + intervention) | 202.50 (139) | - | - | 0.971 | 0.964 | 0.054 | 0.073 |

CM: compared model in *χ2* test; EP: estimation problem

In **bold**: best fitting model

Table S2.

Results from the fitted Multivariate Latent Curve Models (LCM), Autoregressive Models, and Autoregressive Latent Trajectory (ALT) Models for mindfulness (MAAS) and negative affect (NA).

| Models | χ2 (df) | CM | Δ χ2 (df), *p* | CFI | TLI | RMSEA | SRMR |
| --- | --- | --- | --- | --- | --- | --- | --- |
| 1. LCM, full model | 321.10 (157) | - | - | 0.914 | 0.916 | 0.081 | 0.093 |
| 2. Autoregressive, full model | 293.06 (112) | - | - | 0.904 | 0.870 | 0.101 | 0.125 |
| 3. ALT, full model | 145.85 (106) | - | - | 0.979 | 0.970 | 0.049 | 0.060 |
| 4. ALT, nested LCM model | 233.63 (138) | 3 | 87.79 (32), <.01 | 0.949 | 0.944 | 0.066 | 0.085 |
| 5. ALT, no slope variance on MAAS | 186.47 (112) | 3 | 40.63 (6), <.01 | 0.961 | 0.946 | 0.065 | 0.059 |
| 6. ALT, no slope on MAAS | 186.61 (113) | 3 | 40.76 (7), <.01 | 0.961 | 0.948 | 0.064 | 0.059 |
| 7. ALT 3 + no slope variance on NA | 181.48 (112) | 3 | 35.63 (6), <.01 | 0.963 | 0.950 | 0.062 | 0.072 |
| 8. ALT 3 + no slope on NA | 182.63 (113) | 3 | 36.79 (7), <.001 | 0.963 | 0.950 | 0.062 | 0.075 |
| 9. ALT 3 + no time-specific uniqueness correlations | EP |  |  |  |  |  |  |
| 10. ALT 3 + fixed time-specific uniqueness correlations | 154.61 (113) | 3 | 8.76 (7), ns | 0.978 | 0.970 | 0.048 | 0.064 |
| 11. ALT 10 + fixed autoregressions for MAAS | 168.28 (120) | 10 | 13.68 (7), ns | 0.974 | 0.968 | 0.050 | 0.080 |
| 12. ALT 11 + fixed autoregressions for NA | 178.94(127) | 11 | 10.65 (7), ns | 0.973 | 0.967 | 0.051 | 0.081 |
| 13. ALT 12 + fixed MAAS > NA regressions | 189.55 (134) | 12 | 10.62 (7), ns | 0.971 | 0.967 | 0.051 | 0.078 |
| **14. ALT 13 + fixed NA > MAAS regressions** | **201.89 (141)** | **13** | **12.34 (7), ns** | **0.968** | **0.965** | **0.052** | **0.077** |
| Final conditional multivariate ALT (ALT 14 + intervention) | 215.05 (153) | - | - | 0.968 | 0.964 | 0.051 | 0.075 |

CM: compared model in *χ2* test; EP: estimation problem

In **bold**: best fitting model
